# Supplementary material for: MixMC: A Multivariate Statistical Framework to Gain Insight into Microbial Communities
Source: PLOS journal article supplement (doi:10.1371/journal.pone.0160169), 2016-08-11
Supplement: S2 (10.1371/journal.pone.0160169.s002) [file journal.pone.0160169.s002]

## Supporting Information

### S1 Table

Table S1: Description of the two HMP data sets through preprocessing steps.

|                               | Most Diverse body sites | Oral body sites |
|-------------------------------|-------------------------|-----------------|
| # initial OTU                 | 43,140                  | 43,140          |
| # raw OTU after pre-filtering | 1,674                   | 1,562           |
| # samples                     | 162                     | 657             |
| # unique individuals          | 54                      | 73              |
| # body sites                  | 3                       | 9               |
